# Supplementary material for: Safe Use and Storage of Cleaners, Disinfectants, and Hand Sanitizers: Knowledge, Attitudes, and Practices among U.S. Adults during the COVID-19 Pandemic, May 2020
Source: PubMed Central journal article supplement (PMC7866329; doi:10.4269/ajtmh.20-1119), 2020-12-29
Supplement: tpmd201119.SD1.pdf [file tpmd201119.SD1.pdf]

## Supplementary Materials: Survey Questionnaire

*Survey items that collected demographic data or served as data quality filters are not listed. Additionally, seven survey items regarding behaviors specifically intended to prevent SARS-CoV-2 transmission and self-reported health outcomes were not included in the analysis and are not listed.*

### Survey item 1

Which of the following have you heard is true about using household cleaning products (such as bleach or Lysol)? **[Select as many as apply for 01-09. Randomize 01-09]**

- 01 For some household cleaning products, gloves should be used during use
- 02 For some household cleaning products, eye protection should be used during use
- 03 Bleach should not be mixed with ammonia
- 04 Bleach should not be mixed with vinegar
- 05 When making a dilute bleach solution, only room temperature water should be used
- 06 Hands should be washed with soap and water after using household cleaning products
- 07 Hand sanitizers should be kept out of reach of children
- 08 Household cleaning products should be kept out of reach of children
- 09 Good ventilation (air flow) is needed when using cleaning chemicals
- 10 None of these **[EXCLUSIVE]**

### Survey item 2

In the past month, which of the following behaviors have you, or a household member, engaged in? **[Select as many as apply for 01-10. Randomize 01-10]**

- 01 Wore gloves when using a household cleaning product (not including sanitizing wipes)
- 02 Wore eye protection when using a household cleaning product (not including sanitizing wipes)
- 03 Increased ventilation (air flow) when using a household cleaning product (not including sanitizing wipes)
- 04 Read the label prior to using a household cleaning product
- 05 Used hand sanitizer
- 06 Used sanitizing wipes
- 07 Used a new type or brand of household cleaning product
- 08 Prepared homemade cleaning solution (with bleach, ammonia, or vinegar)
- 09 Labeled a homemade cleaning solution
- 10 Purchased hand sanitizer or household cleaning product in bulk sizes
- 11 None of these **[EXCLUSIVE]**

### Survey item 3

How much do you agree or disagree with each of the following statements? **[Select one answer for each. Randomize A-F]**

| 01                | 02                | 03                         | 04             | 05             |
|-------------------|-------------------|----------------------------|----------------|----------------|
| Strongly disagree | Somewhat disagree | Neither agree nor disagree | Somewhat agree | Strongly agree |

- A. I know how to clean and disinfect my home safely
- B. I am able to clean and disinfect my home safely
- C. I know how to store cleaning products in my home safely
- D. I am able to buy or locate the household cleaning products I need to clean my home
- E. I know where to get information on safe cleaning behaviors
- F. People I care about want me to clean my home safely

### Survey item 4

How much do you agree or disagree with each of the following statements? **[Select one answer for each. Randomize A-I]**

| 01                | 02                | 03                         | 04             | 05             |
|-------------------|-------------------|----------------------------|----------------|----------------|
| Strongly disagree | Somewhat disagree | Neither agree nor disagree | Somewhat agree | Strongly agree |

- A. For some household cleaning products, gloves should be used during use to prevent injury
- B. For some household cleaning products, eye protection should be used during use to prevent injury
- C. Washing hands with soap and water after using cleaning household products can prevent injury
- D. Keeping hand sanitizer out of reach of children can prevent injury
- E. Keeping household cleaning products out of reach of children can prevent injury
- F. Misuse of household cleaning products can result in injury
- G. Reading the label of household cleaning products prior to use can prevent injury
- H. Homemade cleaning solutions should be properly labeled
- I. Injuries from misuse of household cleaning products are a common problem
